## Elucidation of Dose-Effect Relationships for Different Opiate Effects Using Alfentanil in the Spontaneously Ventilating Rat

Patrick K. Yang, M.D.,\* Matthew B. Weinger, M.D.,† S. Steven Negus, Ph.D.‡

In addition to producing antinociception and mild sedation, opiates diminish spontaneous movement and produce muscle rigidity. Examination of the relationship between different opiate effects may lead to a better understanding of the mechanism and sites of action of opiate anesthesia. Previous studies have compared the dose-effect relationships for morphine and fentanyl between antinociception and loss of righting reflex. However, neither muscle rigidity nor lack of spontaneous movement (as measured by catalepsy) has been fully examined or directly compared with either antinociception or loss of righting reflex. This study, therefore, compared five clinically relevant opiate endpoints (antinociception, muscle rigidity, catalepsy, loss of righting reflex, and respiratory depression) using the  $\mu$ -selective agonist alfentanil in the spontaneously ventilating rat. Rats were randomized to receive alfentanil (0–500  $\mu\text{g}/\text{kg}$ ) subcutaneously. For muscle rigidity, 59 rats had electromyographic activity measured with percutaneous hindlimb electrodes. After alfentanil injection, electromyographic data were recorded for 60 min. For antinociception and catalepsy, 49 rats were studied for 120 min after alfentanil. Catalepsy was measured from the time the rat's forelimbs were placed on a 10-cm-high bar until either limb was removed. Antinociception was studied by measuring tail-flick response to hot (55° C) water. For righting reflex, 40 rats were studied for 120 min. Alfentanil-induced respiratory depression was assessed in 40 rats with indwelling tail arterial catheters. Alfentanil was administered after baseline arterial blood gas measurements, and then additional samples were obtained for 45 min. For each effect, data were converted into quantal responses and were then transformed to probit-log dose-response curves for analysis. There were no significant differences in the slope of the dose-response relationships between the four endpoints studied. The effective dose in 50% of animals ( $\text{ED}_{50}$ ) for antinociception (46  $\mu\text{g}/\text{kg}$ ) differed significantly from that for catalepsy (114  $\mu\text{g}/\text{kg}$ ), elevation of  $\text{PaCO}_2$  (146  $\mu\text{g}/\text{kg}$ ), and loss of righting reflex (215  $\mu\text{g}/\text{kg}$ ), and the  $\text{ED}_{50}$  for muscle rigidity (62  $\mu\text{g}/\text{kg}$ ) differed significantly from that for elevation of  $\text{PaCO}_2$  and loss of righting reflex. The results are discussed in the context of other data

on the opioid receptors' mediation of different opiate effects. These techniques and the data obtained will aid in the elucidation of the pharmacology of different opiate effects and their underlying receptor mechanisms. (Key words: Anesthetics, intravenous: alfentanil. Animals: rodent. Pharmacology: dose-response curves. Potency, anesthetic:  $\text{ED}_{50}$ .)

A COMPLETE ANESTHETIC AGENT must produce a decreased level of consciousness, as well as amnesia, analgesia, and blunting of the cardiovascular response to surgical manipulation. Currently available opiates are used widely in anesthesia because they reliably address the latter two requirements. However, their use may be complicated by untoward effects such as respiratory depression and muscle rigidity. It has been suggested that different effects of high-dose opiates are mediated by different opioid receptor populations.<sup>1,2</sup> Although this hypothesis remains to be proven, the ability pharmacologically to separate the opiates' desirable effects from their undesirable ones on the basis of opioid receptor specificity could lead to the development of new clinically valuable opiate drugs. The study of the dose-effect relationships of both the desirable and undesirable effects of opiates will contribute to the understanding of opioid receptor pharmacology.

Previous studies have demonstrated the validity of evaluating the dose-effect curve of a single drug on a number of effects to illuminate possible differences in the mechanisms responsible for those effects.<sup>1,3-5</sup> For example, Kissin and colleagues generated dose-effect curves for morphine and fentanyl on three different end-points: antinociception (as measured by the lack of purposeful movement response to a noxious stimulus), loss of righting reflex, and prevention of the increased heart rate response to a noxious stimulus.<sup>3</sup> In this study, the reduction of the movement and heart rate responses to a noxious stimulus by fentanyl appeared to be mediated by different underlying mechanisms. Similarly, Ling and colleagues found different dose-effect relationships for opiate-induced antinociception compared with respiratory depression.<sup>1</sup>

Alfentanil, a relatively potent and  $\mu$ -selective opiate agonist, has been widely used clinically as an analgesic and anesthetic because of its short duration of action. One of the factors limiting the use of high-dose alfentanil is the occurrence of significant muscle rigidity.<sup>6</sup> Opiate-induced rigidity, which occurs in both humans and animals,<sup>6-8</sup> is only one component of opiate-induced catatonia.<sup>9</sup> Another component of opiate catatonia is lack of spontaneous movement, also known as akinesia or catalepsy. Catalepsy, a disorder of movement, may be pharmacologically distinguished from rigidity, a disorder of muscle tone.<sup>10-12</sup>

\* Medical Student, University of California, San Diego. Present address: Department of Anesthesiology, University of Washington School of Medicine, Seattle, Washington.

† Assistant Professor of Anesthesiology, University of California, San Diego; Staff Physician, San Diego Veterans Affairs Medical Center; Assistant Adjunct Member, Scripps Research Institute.

‡ Research Fellow, Department of Anesthesiology, University of California, San Diego; Department of Neuropharmacology, Scripps Research Institute. Present address: Department of Pharmacology, University of Michigan School of Medicine, Ann Arbor, Michigan.

Received from the Department of Anesthesiology, University of California, San Diego; the Opiate Neuropharmacology Research Laboratory of the Veterans Affairs Medical Center, San Diego; and the Department of Neuropharmacology, Scripps Research Institute, La Jolla, California. Accepted for publication March 13, 1992. Supported by grants from the Department of Veterans Affairs and the National Institute of Drug Abuse (DA04043). This is publication 7208-NP from the Scripps Research Institute.

Address reprint requests to Dr. Weinger: VA Medical Center (125), 3350 La Jolla Village Drive, San Diego, California 92161.

Previous studies have suggested that opiate-induced muscle rigidity, catalepsy, antinociception, and respiratory depression may be mediated by different neuroanatomic and neuropharmacologic mechanisms.<sup>2,8,11-17</sup> In the present study, the dose-effect relationships for subcutaneously administered alfentanil in producing these different endpoints of opiate action were evaluated to allow further insight into the nature of these opiate effects.

## Materials and Methods

### ANIMALS

One hundred forty-eight male Wistar rats (Harlan Laboratories, Indianapolis, IN) weighing 215–370 g were studied during a 3-month period. A second cohort of 50 rats weighing 250–400 g were studied subsequently to examine the dose-effect relationship for alfentanil-induced respiratory depression and behavioral effects. In all studies, animals were housed, two or three per cage, in a temperature-controlled environment with 12-h cycles of alternating light and darkness. Access to food and water was unrestricted. Prior to each study, animals were habituated to the handling and experimental procedures. Each animal was only studied once. The experimental protocol was approved by the Animal Care Committee of the San Diego VA Medical Center.

### DRUG

Alfentanil hydrochloride (15–500  $\mu\text{g/kg}$ ; Janssen Pharmaceutica, Piscataway, NJ) was dissolved in 0.9% sterile physiologic saline and injected subcutaneously in a volume of 1 ml/kg. In all experiments, animals were randomly assigned to treatment groups, and the observer was blind to the dose of alfentanil used.

### PROCEDURES

#### *Muscle Rigidity*

To acclimate the animals to the experimental conditions, 3 days before the experiment the animals were placed individually in barred cylindrical holding cages that permitted free movement of all extremities. Groups of three or four were then placed inside a Coulbourn soundproof chamber (Coulbourn Instrument Co., Lehigh Valley, PA) and separated by cardboard partitions for three 1-h intervals.

For the muscle rigidity experiment, animals again were placed in the barred cylindrical holding cages. Two monopolar platinum recording electrodes (Grass E2, Grass Instruments, Quincy, MA) were inserted percutaneously into the left gastrocnemius muscle, and a third, ground electrode was inserted into the right hindlimb.<sup>7,8,18</sup> Animals were then placed alone in a Coulbourn chamber.

The raw electromyographic (EMG) signal was differentially amplified 200 times and band-pass-filtered from 10 Hz to 3 kHz (Grass P511K). The resulting signal, viewed on an oscilloscope (Tektronix 7633, Tektronix Inc., Beaverton, OR), was then converted with a root-mean-squared voltage rectifier (time constant of 3 s) to produce time-varying analog deflections on Triplet 200-mV meters. The amplified EMG signal was displayed on a four-channel strip-chart recorder calibrated to 1 mv/division and running at 5 cm/s. The signal was also full-wave-rectified and integrated by a signal processor (Grass 7P10E) calibrated such that vertical pen travel per unit time on the four-channel strip-chart recorder was proportional to the root-mean-squared power of the EMG signal.

Fifty-nine animals were randomly assigned to one of eight dose groups. Baseline EMG activity was recorded at 1-min intervals for 15 min prior to treatment with alfentanil. After administration of alfentanil, EMG activity was recorded at 5-min intervals for 60 min.

#### *Catalepsy/Antinociception*

Forty-nine animals were randomly assigned to one of eight dose groups. For the catalepsy (bar) test, the animal's two forelimbs were placed over a metal bar situated 10 cm above the ground. Catalepsy time was measured from the time that the forelimbs were placed onto the bar to the time that one of the limbs was removed from the bar. A 30-s cut-off was used. Although cut-off times have long been used to study opiate-induced catalepsy,<sup>19,20</sup> in the present study the primary purpose of the cut-off was to ensure uniformity of timing of the antinociceptive tests that followed immediately thereafter. Thus, after each bar test, the most distal 3 cm of each animal's tail was immersed into 55° C water. Tail-flick latency was measured from the moment of tail immersion to either the complete removal of the animal's tail from the water or a forceful movement of the tail from its original position.<sup>21</sup> A cut-off of 10 s was used to prevent tissue damage. Three baseline readings for catalepsy and antinociception were taken at 5-min intervals prior to alfentanil treatment. Both catalepsy time and tail-flick latency were measured 5 min and 15 min after injection and at 15-min intervals for a total of 120 min. The catalepsy test always preceded the tail-immersion test.

#### *Righting Reflex*

Forty animals were randomly assigned to one of five treatment groups. The righting reflex was measured by placing the animal onto its back and measuring how long it took to regain an upright posture. If the distal end of any limb made contact with the table surface, the righting reflex was considered intact. The righting reflex was con-

sidered absent when all four limbs remained off the table surface for at least 15 s. After a baseline righting reflex, one of the five doses of alfentanil was injected subcutaneously into the dorsal back region. After alfentanil treatment, each animal was placed on its back every 15 s for 10 min. Whenever an animal lost its righting reflex, the experimenter briskly clapped to assess the animal's ability to right with auditory stimulation. The response to hand-clapping was not used in the data analysis of the presence or absence of loss of righting reflex. Hand clapping was performed to examine whether the endpoint of loss of righting reflex after high-dose opiate administration was truly equivalent to loss of righting reflex after other anesthetic agents.<sup>22</sup> The time to loss of righting reflex following drug treatment and the presence or absence of loss of righting were measured for each animal.

#### *Respiratory Depression*

Forty halothane-anesthetized animals were implanted with dorsal tail arterial catheters using a method described previously.<sup>23</sup> For the experiment, the rats were placed in holding cages inside a soundproof chamber (see above) and were permitted at least 60 min of recovery following catheter placement. Baseline room air arterial blood gas samples were collected twice during a 15-min period. One of five doses of alfentanil was then injected (100–500  $\mu\text{g}/\text{kg}$ ), and arterial samples were obtained 5, 15, 30, and 45 min postinjection. Arterial blood samples, 200  $\mu\text{l}$ , were drawn through a side port in the arterial catheter and analyzed for  $\text{pH}$ ,  $\text{PaCO}_2$ , and  $\text{PaO}_2$  with an Instrumentation Laboratories  $\text{pH}/\text{gas}$  analyzer (IL-1306, Lexington, MA) run at 37° C and calibrated each day. No more than 15 min is required to attain steady-state respiratory parameters in conscious animals habituated to the experimental apparatus,<sup>23,24</sup> and the minimal restraint has no effect on baseline minute ventilation or arterial blood gas values.<sup>23,25</sup>

#### *Behavior*

Ten previously handled animals were randomly assigned to a treatment group and then placed in an open field environment for 15 min and scored for a number of discrete well-described behaviors. A 24-cm-high open cardboard box (48.3 cm by 66 cm) with a single 2 cm diameter hole in one side 3 cm above the floor was used. Each rat was scored by a blinded observer (0 = absent, 1 = reduced, 2 = normal, and 3 = increased), based on normal rat behavior in such an environment, for overall spontaneous activity; rearing; grooming; sniffing; nose pokes into the 2-cm hole; corneal reflex; and startle reflex in response to hand-clapping. After baseline scoring, each animal was removed from the box, given a dose of alfentanil (100–500  $\mu\text{g}/\text{kg}$  subcutaneously) and immediately

returned to the box. Blinded behavioral scoring then resumed at 1-min intervals for the first 5 min and then at 5-min intervals for a total of 30 min.

#### STATISTICAL ANALYSIS

Data from each of the five studies were analyzed individually. Raw data values (EMG [microvolts], catalepsy [seconds], antinociception [seconds], loss of righting reflex [seconds],  $\text{PaCO}_2$  [mmHg],  $\text{PaO}_2$  [mmHg], and  $\text{pH}$ ) were used for graphic presentation, and, for most of the effects, were used as the variables in statistical analysis. However, for statistical analysis of data in the two effects using cut-offs (antinociception and catalepsy), the raw data for each effect were adjusted to obtain the percent maximum attainable effect by using the standard formula: maximum attainable effect =  $([\text{result} - \text{baseline}]/[\text{cut-off} - \text{baseline}]) \times 100$ .<sup>15</sup> Statistical differences between treatment groups (raw or maximum attainable effect) for each effect over time were then determined using two-way analyses of variance followed by Newman-Keuls *a posteriori* tests. A *P* value of less than 0.05 was considered statistically significant.

Raw data for each effect for each animal were also transformed to a quantal response (presence or absence of expected drug effect) to generate uniform quantal dose-response graphs to permit direct comparison of different effects. For muscle rigidity, catalepsy, antinociception, and righting reflex, the occurrence of any raw data value of greater than four times the baseline value was determined to be a positive response (based on preliminary data). For example, if the mean baseline antinociceptive response latency was 2 s, and, after a particular dose of alfentanil, the mean latency was 9 s, then this would be considered a positive response. Four times baseline was selected to ensure a strong and definitive positive response. This criteria was chosen because it permitted a positive response for each endpoint to be "clinically relevant." It should be noted that reanalysis of the data using a criteria of either three or five times baseline did not appreciably alter the results. Because the baseline values of arterial  $\text{PaO}_2$ ,  $\text{PaCO}_2$ , and  $\text{pH}$  are nonzero values, a multiple of the baseline could not be used in the quantal analysis. Instead, the arterial blood gas data were converted to percentage of animals responding using a criteria of four times the standard deviation of the baseline values in each dose group.

The percentage of animals with positive responses for each treatment group for each effect was determined. A computer program<sup>26</sup> was used to convert the percentage of animals with positive responses to probit values<sup>3</sup> and to obtain the effective dose in 50% of the animals ( $\text{ED}_{50}$ ) and the slope of the dose-effect curve in each group. For each effect, the maximal dose that produced minimal or

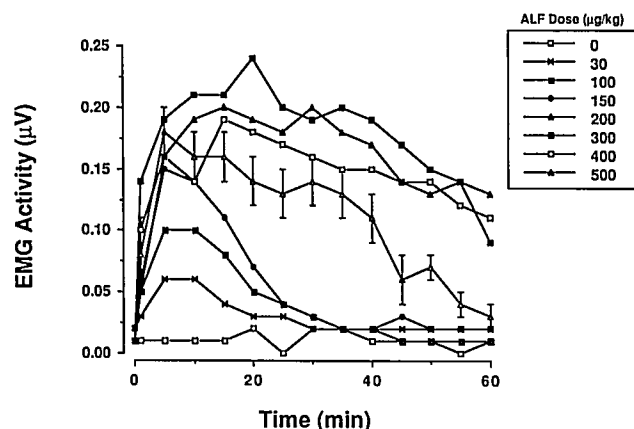

FIG. 1. The effect of alfentanil (ALF) treatment on muscle rigidity. Hindlimb muscle tone, presented on the y-axis, is measured by recording electromyographic (EMG) activity (millivolts root-mean-squared). Time is presented along the x-axis (in minutes). In the interest of clarity in this and the subsequent figures, error bars ( $\pm$ SEM) are shown only for an intermediate dose of alfentanil (200  $\mu$ g/kg). In rats treated with saline or 15  $\mu$ g/kg alfentanil, no significant muscle rigidity was recorded. In rats given 100, 150, or 200  $\mu$ g/kg alfentanil, significant muscle rigidity was observed for 20, 30, and 40 min, respectively. For alfentanil doses greater than 200  $\mu$ g/kg, significant muscle rigidity was recorded for the entire 60-min experimental period. Note that the same symbol has been used throughout all of the figures for each specific dose of alfentanil to facilitate comparison of time-effect relationships among the different opiate effects studied.

no response, the minimal dose that produced maximal response, and all of the doses in between were used in this analysis. The slopes and  $ED_{50}$  values for each effect were analyzed and compared using the Litchfield and Wilcoxon II procedure in the same computer program.<sup>26</sup> With this technique,  $ED_{50}$  values can be statistically compared by calculating potency ratios (the ratios of  $ED_{50}$  values for two effects). If the 95% confidence interval for a potency ratio fails to include 1.0, then the two effects have significantly different  $ED_{50}$  values.

### Results

#### TIME-EFFECT RELATIONSHIPS

Alfentanil produced a dose-dependent increase in both the magnitude and duration of muscle rigidity (fig. 1), catalepsy (fig. 2), and antinociception (fig. 3). In addition, alfentanil produced a dose-dependent increase in the percent of rats displaying a loss of righting reflex (fig. 4). The lowest dose of alfentanil producing an effect significantly different from saline differed across these four endpoints. For antinociception, the most sensitive endpoint, a dose of 30  $\mu$ g/kg alfentanil produced a significant increase in tail-dip latency at 15 min postinjection. For muscle rigidity, the lowest effective dose was 100  $\mu$ g/kg, which produced a significant increase in muscle rigidity for 20 min. For catalepsy, 200  $\mu$ g/kg alfentanil was the

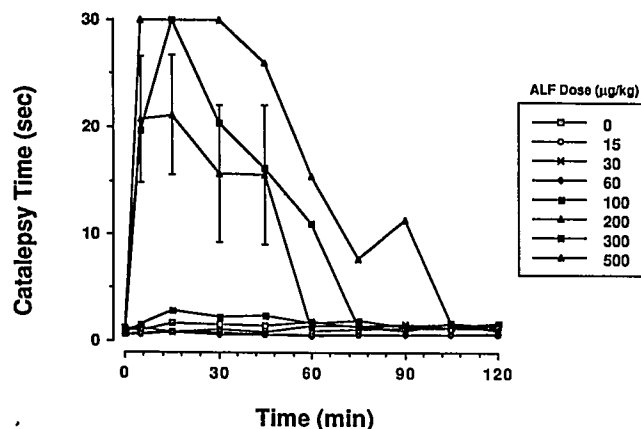

FIG. 2. The effect of alfentanil (ALF) treatment on catalepsy. The duration of catalepsy (30-s cut-off), as measured with the bar test, is presented on the y-axis. Time (in minutes) is presented along the x-axis. Treatment with 100  $\mu$ g/kg or less of alfentanil did not produce catalepsy. Alfentanil in doses of 200, 300, or 500  $\mu$ g/kg produced the onset of significant catalepsy within 5 min ( $P < 0.05$  compared with saline control) that persisted for 45, 60, and 90 min, respectively. In addition, an alfentanil dose of 500  $\mu$ g/kg produced higher maximal responses than did smaller doses.

lowest effective dose, and this dose produced a significant increase in catalepsy for 45 min. One half of the animals lost their righting reflex at 250  $\mu$ g/kg alfentanil, and all of the animals did so with alfentanil doses of 300  $\mu$ g/kg or greater. There was also a dose-dependent decrease in the time to loss of righting.

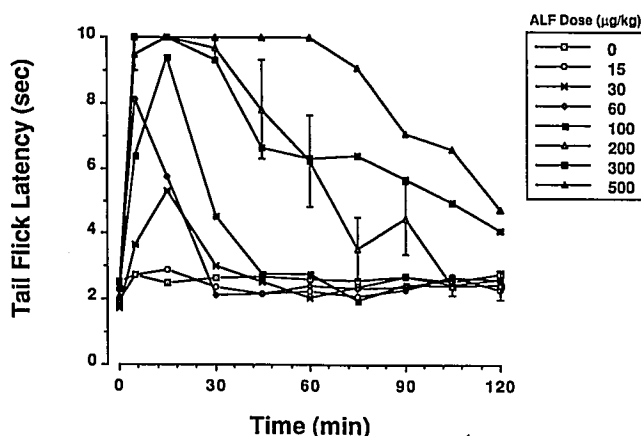

FIG. 3. The antinociceptive effects of alfentanil (ALF) treatment. Antinociception as measured by tail-flick latency (10-s cut-off) is presented on the y-axis, and time (in min) is presented on the x-axis. Rats given alfentanil 15  $\mu$ g/kg had no alteration in tail-flick latency compared with baseline. Alfentanil in doses of 30, 60, and 100  $\mu$ g/kg resulted in less than 30 min of significant antinociception. Alfentanil 200  $\mu$ g/kg produced 60 min of significant prolongation of tail-flick latency, whereas doses of 300  $\mu$ g/kg and greater produced 120 min of antinociception. In addition, at higher doses of alfentanil ( $\geq 300$   $\mu$ g/kg), there was a greater incidence of maximal response.

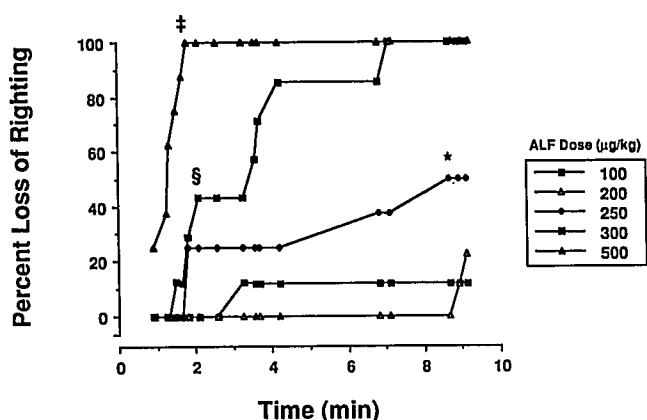

FIG. 4. The effect of alfentanil (ALF) treatment on righting reflex. The incidence of loss of righting reflex (percent of animals in each dose group losing their righting reflex) is presented on the y-axis, and time (in minutes) is presented on the x-axis. Alfentanil, in a dose-dependent manner, produced a more rapid onset and an increased incidence of loss of righting. At doses of 300 µg/kg and greater, all animals lost their righting reflex. The time of onset of loss of righting was significantly faster after 500 µg/kg than after any lower dose, and this highest dose of alfentanil produced a higher incidence of loss of righting than did doses of less than 300 µg/kg ( $\dagger P < 0.05$ ). Alfentanil 300 µg/kg produced a more rapid onset and a higher incidence of loss of righting than did doses of 200 µg/kg or less ( $\S P < 0.05$ ). Alfentanil 250 µg/kg was significantly more likely to produce loss of righting than were lower doses ( $*P < 0.05$ ).

#### ARTERIAL BLOOD GASES

Subcutaneous alfentanil produced predictable dose-related changes in arterial blood gas values consistent with opiate-induced respiratory acidosis (fig. 5), hypercapnia (fig. 6), and hypoxemia (fig. 7). Arterial pH (fig. 5) was not significantly affected by an alfentanil dose of 100 µg/kg. Although the pH values at 5 and 15 min after alfentanil 150 µg/kg were significantly lower than baseline values, persistent acidosis did not occur until 200 µg/kg was administered, and profound acidosis occurred with 300 µg/kg. Except at 5 min, there were no significant differences in pH between the 300- and 500-µg/kg doses.

As might be expected, the pattern of response in  $\text{PaCO}_2$  (fig. 6) was quite similar to that described above for arterial pH. A significant elevation in  $\text{PaCO}_2$  did not occur until a dose of 150 µg/kg was administered, and the effects of this dose were not different from that caused by the next higher dose (200 µg/kg). Profound hypercapnia occurred at 300 µg/kg, and these effects were not appreciably different from those at the highest dose studied.

In contrast to ventilation, it appeared that oxygenation was affected at a lower alfentanil dose (fig. 7). Alfentanil 100 µg/kg produced a mild but significant decrease in  $\text{PaO}_2$ . There was then a further dose-dependent decrease in  $\text{PaO}_2$  up to an alfentanil dose of 300 µg/kg. The highest

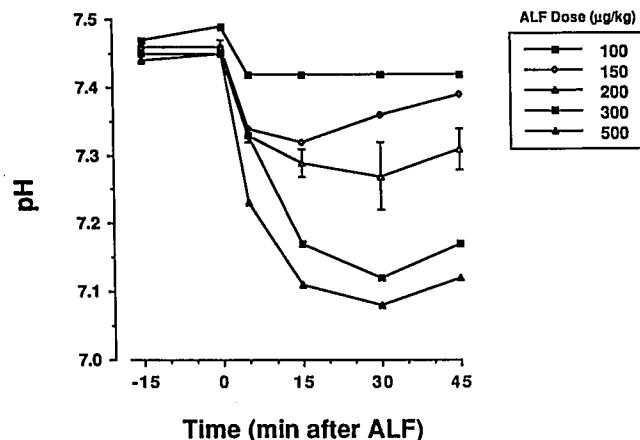

FIG. 5. The effect of alfentanil (ALF) treatment on arterial pH. The pH (displayed on the y-axis) was measured at 5–15-min intervals (time on the x-axis) before and after subcutaneous alfentanil administration (100–500 µg/kg). Rats given alfentanil 100 µg/kg showed no change in arterial pH. Although the pH values at 5 and 15 min after 150 µg/kg were significantly lower than baseline or control values, persistent acidosis was not seen until alfentanil 200 µg/kg. pH was profoundly decreased after both 300 and 500 µg/kg alfentanil. Note that even at the highest alfentanil dose, there was at least partial recovery by 45 min after opiate injection.

dose of alfentanil produced no additional change in  $\text{PaO}_2$ . It should also be noted that, for all three arterial blood gas indices, by 45 min the animals showed significant recovery from alfentanil-induced respiratory depression.

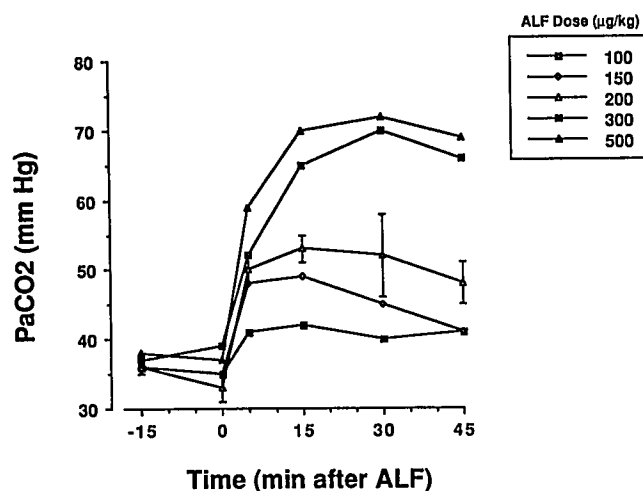

FIG. 6. The effect of alfentanil (ALF) treatment on arterial  $\text{PaCO}_2$ . Arterial samples were obtained at 5–15-min intervals before and after alfentanil (100–500 µg/kg subcutaneous). The dose-effect pattern for  $\text{PaCO}_2$  was quite similar to that for arterial pH. A significant elevation in  $\text{PaCO}_2$  did not occur until alfentanil 150 or 200 µg/kg was administered. The effects of these two doses were not significantly different from each other. Profound hypercapnia occurred with alfentanil 300 µg/kg, and the effects at this dose were not significantly different from those seen at 500 µg/kg.

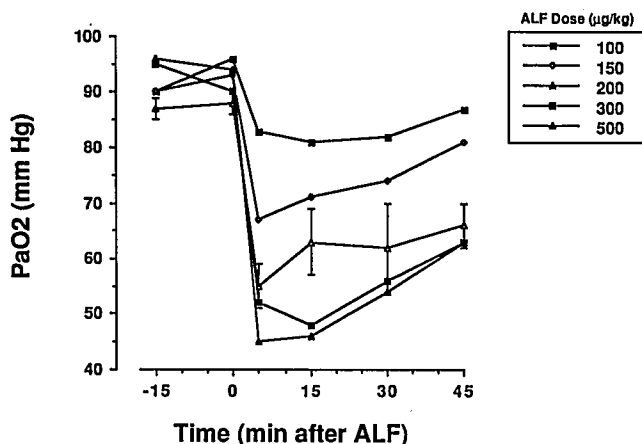

FIG. 7. The effect of alfentanil (ALF) treatment on arterial  $\text{PaO}_2$ . Arterial samples were obtained at 5–15-min intervals before and after alfentanil (100–500  $\mu\text{g}/\text{kg}$  subcutaneous). In contrast to ventilation, it appeared that oxygenation was affected at a lower alfentanil dose. Alfentanil 100  $\mu\text{g}/\text{kg}$  produced a mild but significant decrease in  $\text{PaO}_2$ . There was then a further dose-dependent decrease in  $\text{PaO}_2$  at an alfentanil dose of up to 300  $\mu\text{g}/\text{kg}$ . The highest dose of alfentanil produced no additional change in  $\text{PaO}_2$ .

### BEHAVIOR

Overall, the behavior of animals receiving even very low doses of alfentanil (*e.g.*, 50  $\mu\text{g}/\text{kg}$ ) was mildly obtunded, as manifested by slightly decreased exploratory behavior and locomotion. Nose-poke activity appeared to be appreciably reduced at alfentanil 100  $\mu\text{g}/\text{kg}$ . Rearing and grooming were obtunded with an alfentanil dose of 200  $\mu\text{g}/\text{kg}$ , whereas sniffing behaviors, though diminished at lower doses, were not seriously affected until the animals had received alfentanil 300  $\mu\text{g}/\text{kg}$ . Eye reflexes appeared relatively more resistant to alfentanil. Corneal responses persisted for up to 15 min after alfentanil 300  $\mu\text{g}/\text{kg}$  but were rapidly (within 2 min) and completely ablated by an alfentanil dose of 500  $\mu\text{g}/\text{kg}$ .

In the first phase of the study, with the exception of one animal in the 500- $\mu\text{g}/\text{kg}$  dose group, every animal that met the criteria for loss of righting reflex at any alfentanil dose still exhibited a detectable startle response to hand-clapping. On more formal behavioral examination using the separate cohort of animals, it was ascertained that startle reflex exhibited a complex biphasic dose-effect relationship. While control and low-dose (< 100  $\mu\text{g}/\text{kg}$ ) alfentanil-treated animals showed minimal if any response to hand-clapping, animals given 200–300  $\mu\text{g}/\text{kg}$  generally had markedly exaggerated acoustic startle responses manifested by persistent forward locomotion (so-called “festinating” locomotion<sup>27</sup>). However, at the highest dose of alfentanil studied, this response was no

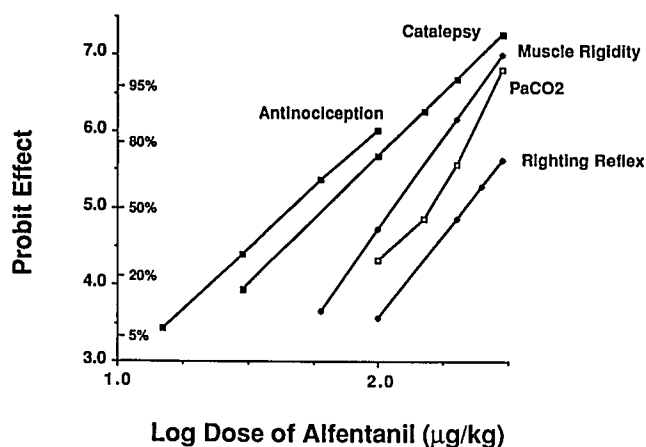

FIG. 8. The relationship of the (log) dose of alfentanil (ALF) to different end-effects. Percentage positive response for each end-effect was converted to probit values and is presented on the y-axis. The log dose of alfentanil is presented on the x-axis. There were no differences in the slopes of the dose-effect curves for the five effects studied. The  $\text{ED}_{50}$  of antinociception was significantly different from that of catalepsy,  $\text{PaCO}_2$ , and righting reflex, whereas the  $\text{ED}_{50}$  of muscle rigidity differed significantly from that of  $\text{PaCO}_2$  and righting reflex.

longer seen, and instead the animals exhibited only a modest flinch with hand-clapping.

### DOSE-EFFECT RELATIONSHIPS

As a further means of comparing alfentanil's effects on muscle rigidity, catalepsy, antinociception, ventilatory depression, and loss of righting reflex, the log dose of alfentanil was compared to the probit conversion of the quantal responses for each of the five endpoints (fig. 8). There were no significant differences between the slopes for any of the dose-effect curves (table 1). Based on potency ratio analysis (table 2), the  $\text{ED}_{50}$  for antinociception

TABLE 1. Probit Slope Values,  $\text{ED}_{50}$  Values, and  $\text{ED}_{50}$  Confidence Intervals

| Experiment      | $\text{ED}_{50}$ ( $\mu\text{g}/\text{kg}$ ) | Probit Slope of Dose-Effect Curve |
|-----------------|----------------------------------------------|-----------------------------------|
| Antinociception | 46.0 (26.1–80.9)*                            | 3.24                              |
| Muscle Rigidity | 62.2 (35.0–110.4)†                           | 3.33                              |
| Catalepsy       | 114.3 (66.4–196.7)                           | 4.77                              |
| $\text{PaCO}_2$ | 145.9 (113.9–186.7)                          | 4.05                              |
| Righting Reflex | 215.0 (159.1–290.6)                          | 4.30                              |

Numbers in parentheses represent 95% confidence intervals.

\* Significantly ( $P < 0.05$ ) different from catalepsy,  $\text{PaCO}_2$ , and righting reflex.

† Significantly ( $P < 0.05$ ) different from  $\text{PaCO}_2$  and righting reflex.

TABLE 2. Potency Ratios with 95% Confidence Intervals

| Comparison            | Potency Ratio | Confidence Intervals |
|-----------------------|---------------|----------------------|
| AN/MR                 | 0.74          | 0.16-3.37            |
| AN/CT                 | 0.42          | 0.18-0.88*           |
| ANPaCO <sub>2</sub>   | 0.32          | 0.17-0.58*           |
| AN/RR                 | 0.21          | 0.11-0.41*           |
| MR/CT                 | 0.54          | 0.25-1.20            |
| MR/PaCO <sub>2</sub>  | 0.43          | 0.23-0.80*           |
| MR/RR                 | 0.29          | 0.15-0.55*           |
| CT/PaCO <sub>2</sub>  | 0.78          | 0.43-1.42            |
| CT/RR                 | 0.53          | 0.12-2.33            |
| PaCO <sub>2</sub> /RR | 0.68          | 0.45-1.00            |

AN = antinociception; MR = muscle rigidity; CT = catalepsy; RR = righting reflex.

\* Significantly ( $P < 0.05$ ) different from 1.00, indicating that the two effects have significantly different dose-response curves.

was significantly different from the ED<sub>50</sub>s for catalepsy, PaCO<sub>2</sub>, and loss of righting reflex. In addition, the ED<sub>50</sub> for muscle rigidity was significantly different from the ED<sub>50</sub>s for PaCO<sub>2</sub> and loss of righting reflex.

### Discussion

These results corroborate earlier work demonstrating that  $\mu$ -opioid agonists produce antinociception, muscle rigidity, catalepsy, and loss of righting reflex in rats.<sup>8,11-14,16,28</sup> The present study extends these results by examining in detail the relative potency of the clinically important opiate agonist alfentanil in producing each of these effects. Specifically, the results of this study indicate that the order of sensitivity of these endpoints to alfentanil was antinociception > muscle rigidity > catalepsy > elevation of PaCO<sub>2</sub> > loss of righting reflex.

These results corroborate previous work showing that different opioid agonists produce different effects with different potencies. Similar to the present findings, the results of Kissin *et al.* demonstrated that, for both fentanyl and morphine, the prevention of purposeful movement to a noxious stimulus had a lower ED<sub>50</sub> than did the loss of righting reflex.<sup>3</sup> The potency ratio of antinociception/righting reflex was 0.13 for morphine and 0.42 for fentanyl. In the present study, the potency ratio of antinociception/righting reflex for alfentanil was 0.21. These different potency ratios between opioid agonists could reflect the agonists' differential affinity and efficacy for various opioid receptor types or subtypes. Alternatively, the different responses with different opioids may be related to different affinities at a single receptor. In either case, because alfentanil is a fentanyl derivative and has a similar (primarily  $\mu$ ) opioid receptor affinity profile, one might have expected the antinociception/righting reflex potency ratio of alfentanil to be more similar to that of fentanyl than to that of morphine.

Analogous to the findings of Kissin *et al.*,<sup>3</sup> Ling *et al.* reported that morphine was more potent in producing antinociception than in producing respiratory depression.<sup>1</sup> In both the Kissin *et al.* and Ling *et al.* studies, the investigators concluded from their findings that differences in the opiates' potency in producing their effects reflected differences in the populations of receptors mediating those effects. Similarly, the results of the present study could be interpreted to suggest that alfentanil-induced antinociception is mediated by a receptor population different (either anatomically or pharmacologically) from that mediating catalepsy, respiratory depression, or loss of righting reflex, and that alfentanil-induced muscle rigidity is mediated by a receptor population different from that mediating respiratory depression and loss of righting reflex.

There is considerable evidence to suggest that the effects of alfentanil evaluated in the present study are mediated by populations of receptors that are anatomically distinct. Whereas catalepsy appears to be mediated by receptors in the nucleus accumbens,<sup>11,29,30</sup> previous studies<sup>11,13</sup> have not supported a role for this site in the expression of opiate rigidity. In fact, using intracranial microinjections of the opiate antagonist methylnaloxonium (125 ng), the regions of the nucleus raphe pontis and the periaqueductal gray have been shown to mediate alfentanil rigidity in the rat.<sup>13</sup> In contrast, rigidity could not be consistently reversed after methylnaloxonium injections into the basal ganglia.

Antinociception appears to be mediated primarily by receptors in subcortical periventricular and spinal sites.<sup>14,16</sup> Animal data suggest that the respiratory actions of exogenous opiates like morphine appear to be mediated not just by brainstem periventricular nuclei<sup>17,31</sup> but also by more distant brain sites as well.<sup>32</sup> The neuroanatomic substrates of opiate-induced loss of righting reflex are likely complex and have not been systematically examined.

Receptor populations could differ from one another in at least two ways. First, the function relating the alfentanil-opioid receptor interaction to the alfentanil-induced effect may be different for some or all of these neuroanatomic sites. Such a variability in the capacity of different tissues to transduce an opiate stimulus into an opiate-induced effect has already been documented in various smooth muscle opiate assays.<sup>33</sup> For example, Miller *et al.*<sup>33</sup> demonstrated that the selective  $\mu$ -opioid agonist *d*-Ala<sup>2</sup>-MePhe<sup>4</sup>-Gly-ol<sup>5</sup>-enkephalin (DAGO) reduced electrically induced contractions of both the mouse vas deferens and the rat vas deferens. However, DAGO was approximately eight times more potent in the mouse vas deferens. Since naloxone was equally potent in reversing DAGO's effects in both tissues, the authors concluded that the differential potency of DAGO between tissues did not reflect differ-

ential affinity for different receptor types. Rather, they concluded that the tissues differed in their ability to transduce the DAGO stimulus into an effect.

A second possibility is that the receptor populations mediating different alfentanil-induced effects may be composed of distinct types of receptors with different affinities for alfentanil. Alfentanil is a selective  $\mu$  agonist, suggesting that all of the effects described in the present study are mediated by  $\mu$ -opioid receptors and not by other opioid receptor types. However, subtypes of the  $\mu$  receptor have been proposed,<sup>34,35</sup> raising the possibility that different alfentanil-induced effects may be mediated by different subtypes of the  $\mu$  receptor.

Agonists for different opioid receptors have differential effects on respiration.<sup>36,37</sup> Martin *et al.*, based on work on the spinal dog,<sup>38</sup> was the first to suggest that the  $\mu$  receptor was responsible for opiate-induced respiratory depression, whereas the  $\delta$  and  $\kappa$  receptor activation produced, respectively, no effect or respiratory stimulation. Others have since theorized that opiate-induced analgesia could be separated pharmacologically from respiratory depression on the basis of opioid receptor specificity.<sup>17,39-41</sup> Ling *et al.*<sup>1</sup> demonstrated that whereas pretreatment with naloxonazine, a noncompetitive  $\mu$  antagonist, blocked morphine analgesia, there was no effect on morphine-induced respiratory depression. Wood *et al.*<sup>42</sup> reported that some  $\kappa$  agonists antagonized morphine respiratory depression without affecting analgesia.

Arterial blood gas sampling was chosen as the measure of opiate-induced respiratory depression because it is relatively easy to perform and correlates well with clinically significant respiratory depression in rats.<sup>23,43</sup> Arterial blood gases have been shown to be sensitive indicators of impaired ventilation and oxygenation in rats exposed to anesthetic drugs<sup>44</sup> as well as to hypoxia and hypercapnia (in a manner quite similar to that in the dog and the human).<sup>40,45</sup> Many previous studies have examined the effects of opiates on arterial blood gases.<sup>23,25,46,47</sup> Importantly, arterial blood gases provide information regarding the contribution of dead-space ventilation when alterations in breathing pattern (respiratory rate *vs.* tidal volume) affect alveolar ventilation.<sup>24,48</sup> Nevertheless, additional studies, perhaps using the ventilatory response to carbon dioxide challenge, should be performed to validate the present data.

In this study, alfentanil was administered subcutaneously. With another route of administration, both the pharmacokinetics and pharmacodynamics of alfentanil would be altered, and it is possible that different results might have been obtained. However, we believe that the relationships among the various dose-effect curves after subcutaneous alfentanil administration may not be ap-

preciably different from that after intravenous administration, for several reasons: 1) there is a quite rapid onset of action after subcutaneous alfentanil; 2) over the steepest portion of the dose-effect curves (which primarily determines the ED<sub>50</sub> values), the cardiac depression and metabolic acidosis caused by alfentanil are less pronounced than at higher doses; and 3) preliminary data for intravenous alfentanil-induced muscle rigidity suggests a similar dose-effect relationship for this one opiate effect.

In conclusion, the present investigation further characterized an important model of opiate effects using alfentanil dose-response relationships for muscle rigidity, catalepsy, antinociception, loss of righting reflex, and respiratory depression. An additional benefit of these data is that they provide normative curves using a standardized animal model against which other opiate drugs or opiate-adjuvant drug combinations can be compared. Further studies to elucidate these effects and their underlying receptor mechanisms are underway.

The authors recognize the technical assistance of Cory Campbell, Cathy Lau, and Julie Bednarczyk. Dr. Tony Yaksh provided invaluable advice on the statistical analysis. Alfentanil was donated by Judy Bonfiglio of Janssen Pharmaceutica.

## References

1. Ling GSF, Spiegel K, Lockhart SH, Pasternak GW: Separation of opioid analgesia from respiratory depression: Evidence for different receptor mechanisms. *J Pharmacol Exp Ther* 232:149-155, 1985
2. Pasternak G: Multiple morphine and enkephalin receptors and the relief of pain. *JAMA* 259:1362-1367, 1988
3. Kissin I, Kerr R, Smith LR: Assessment of anaesthetic action of morphine and fentanyl in rats. *Can Anaesth Soc J* 30:623-628, 1983
4. Kissin I, McGee T, Smith L: The indices of potency for intravenous anaesthetics. *Can Anaesth Soc J* 28:585-590, 1981
5. Kissin I, Morgan P, Smith L: Comparison of isoflurane and halothane safety margins in rats. *ANESTHESIOLOGY* 58:556-561, 1983
6. Benthuyzen J, Smith N, Sanford T, Head N, Dec-Silver H: Physiology of alfentanil-induced rigidity. *ANESTHESIOLOGY* 64:440-446, 1986
7. Weinger MB, Cline EJ, Smith NT, Blasco TA, Koob GF: Localization of brainstem sites which mediate alfentanil-induced muscle rigidity in the rat. *Pharmacol Biochem Behav* 29:573-580, 1987
8. Weinger MB, Segal IS, Maze MM: Dexmedetomidine, acting through central  $\alpha_2$  adrenoceptors, prevents opiate-induced muscle rigidity in the rat. *ANESTHESIOLOGY* 71:242-249, 1989
9. Havemann U, Kuschinsky K: Neurochemical aspects of the opioid-induced "catatonia." *Neurochem Int* 4:199-215, 1982
10. Amalric M, Blasco T, Smith N, Lee D, Swerdlow N, Koob G: Catatonia produced by alfentanil is reversed by methylnaloxonium microinjections into the brain. *Brain Res* 386:287-295, 1986
11. Winkler M, Havemann U, Kuschinsky K: Unilateral injection of



- morphine into the nucleus accumbens induces akinesia and catalepsy, but no spontaneous muscular rigidity in rats. Naunyn Schmiedebergs Arch Pharmacol 318:143-147, 1982
12. Klemm WR: Drug effects on active immobility responses: What they tell us about neurotransmitter systems and motor functions. Prog Neurobiol 32:403-422, 1989
13. Weinger M, Smith N, Blasco T, Koob G: Brain sites mediating opiate-induced muscle rigidity in the rat: Methylnaloxonium mapping study. Brain Res 544:181-190, 1991
14. Yaksh T: Multiple opioid receptor systems in brain and spinal cord. Eur J Anaesthesiol 1:171-199, 201-243, 1984
15. Jensen T, Yaksh T: II. Examination of spinal monoamine receptors through which brainstem opiate-sensitive systems act in the rat. Brain Res 363:114-127, 1986
16. Jensen T, Yaksh T: III. Comparison of the antinociceptive action of mu and delta opioid receptor ligands in the periaqueductal gray matter, medial and paramedial ventral medulla in the rat as studied by the microinjection technique. Brain Res 372:301-312, 1986
17. Florez J, Pazos A, Hurler M, Mediavilla A: Focussing on the respiratory action of opioids. Trends Pharmacol Sci 4:470-472, 1983
18. Weinger MB, Cline EJ, Smith NT, Koob GF: Ketanserin pretreatment reverses alfentanil-induced muscle rigidity. ANESTHESIOLOGY 67:348-354, 1987
19. Koffer K, Berney S, Hornykiewicz O: The role of the corpus striatum in neuroleptic- and narcotic-induced catalepsy. Eur J Pharmacol 47:81-86, 1978
20. Thorn-Gray B, Levitt R, Hill J, Ward K: A neuroanatomic study of analgesia and catatonia induced by etorphine in the rat. Neuropharmacology 20:763-767, 1981
21. Janssen P, Niemegeer C, Dony J: The inhibitory effect of fentanyl and other morphine-like analgesics on the warm-water-induced tail withdrawal reflex in rats. Arzneimittelforschung 13:502-507, 1963
22. Weinger M, Schreiber J, Koob G: Effects of two benzodiazepine inverse agonists, RO 15-4513 and FG 7142, on recovery from pentobarbital and halothane anesthesia in the rat. Pharmacol Biochem Behav 35:889-895, 1990
23. Furst S, Weinger M: Dexmedetomidine, a selective  $\alpha_2$  agonist, does not potentiate the cardiorespiratory depression of alfentanil in the rat. ANESTHESIOLOGY 72:882-888, 1990
24. Polianski J, Brun-Pascaud M, Jelazko P, Pocidalo J: Ventilation in awake rats with permanent arterial catheters. Comp Biochem Physiol 77A:319-324, 1984
25. Lai Y-L, Tsuya Y, Hildebrandt J: Ventilatory responses to acute CO<sub>2</sub> exposure in the rat. J Appl Physiol 45:611-618, 1978
26. Tallarida RJ, Murray RB: Manual of Pharmacologic Calculations with Computer Programs. New York, Springer Verlag, 1986, pp 26-40
27. Chesire R, Cheng H, Teitelbaum P: Reversal of akinesia and release of festination by morphine or GABA applied focally to the nucleus reticularis tegmenti pontis. Behav Neurosci 98:739-742, 1984
28. Bronson JB, Weinger MB: Opiate-induced muscle rigidity is mediated by  $\mu$ , and not  $\delta$  or  $\kappa$  receptors, in the rat (abstract). ANESTHESIOLOGY 71:A600, 1989
29. Almaric M, Koob G: Low doses of methylnaloxonium in the nucleus accumbens antagonize hyperactivity induced by heroin in the rat. Pharmacol Biochem Behav 23:411-415, 1985
30. Costall B, DH F, Naylor R: The induction of catalepsy and hyperactivity by morphine administered directly into the nucleus accumbens of rats. Eur J Pharmacol 49:49-64, 1978
31. Fone K, Wilson H: The effects of alfentanil and selected narcotic analgesics on the rate of action potential discharge of medullary neurones in the anaesthetized rat. Br J Pharmacol 89:67-76, 1986
32. Pellegrino D, Peterson R, Henderson S, Albrecht R: Comparative ventilatory effects of intravenous *versus* fourth cerebroventricular infusions of morphine sulfate in the unanesthetized dog. ANESTHESIOLOGY 71:250-259, 1987
33. Miller L, Shaw JS, Whiting EM: The contribution of intrinsic activity to the action of opioids in vitro. Br J Pharmacol 87:595-601, 1986
34. Pasternak GW, Wood PJ: Minireview: Multiple mu opiate receptors. Life Sci 38:1889-1898, 1986
35. Rothman RB, Jacobson AE, Rice KC, Herkenham M: Autoradiographic evidence for two classes of mu opioid binding sites in rat brain using [<sup>125</sup>I]FK33824. Peptides 8:1015-1021, 1987
36. Hassen A, Feuerstein G, Faden A: Mu receptors and opioid cardiovascular effects in the NTS of rat. Peptides 3:1031-1037, 1982
37. Morin-Surun M, Gacel G, Champagnat J, Denavit-Saubie M, Roques B: Pharmacological identification of delta and mu opiate receptors on bulbar respiratory neurones. Eur J Pharmacol 98:241-247, 1984
38. Martin W, Eades C, Thompson J, Huppler R, Gilbert P: The effects of morphine- and nalorphine-like drugs in the nondependent and morphine-dependent chronic spinal dog. J Pharmacol Exp Ther 197:517-532, 1976
39. Florez J, Pazos A: Comparative effects of opioid peptides on respiration and analgesia in rats. Life Sci 31:1275-1277, 1982
40. Lewis L, Ponten U, Siesjo B: Arterial acid-base changes in unanesthetized rats in acute hypoxia. Respir Physiol 29:312-321, 1973
41. Pazos A, Florez J: A comparative study in rats of the respiratory depression and analgesia induced by mu and delta opioid agonists. Eur J Pharmacol 99:15-21, 1984
42. Wood P, Sanschagrin D, Richard J, Thakur M: Multiple opiate receptor affinities of kappa agonist and agonist/antagonist analgesics: In vivo assessment. J Pharmacol Exp Ther 226:545-550, 1983
43. Kissin I, Brown P, Bradley E, Robinson C, Cassidy J: Diazepam-morphine hypnotic synergism in rats. ANESTHESIOLOGY 70:689-694, 1989
44. Shingu K, Eger E, Johnson B, Lurz F, Taber V: Effects of halothane, isoflurane, enflurane, thiopental, and fentanyl on blood gas values in rats exposed to hypoxia. Anesth Analg 62:155-159, 1983
45. Pepelko W, Dixon G: Arterial blood gases in conscious rats exposed to hypoxia, hypercarbia, or both. J Appl Physiol 38:581-587, 1975
46. Kiritsy-Roy J, Marson L, Van Loon G: Sympathoadrenal, cardiovascular and blood gas responses to highly selective mu and delta opioid peptides. J Pharmacol Exp Ther 251:1096-1103, 1989
47. May C, Dashwood M, Whitehead C, Mathias C: The effects of naloxone on the cardiovascular and respiratory effects of centrally administered corticotrophin releasing factor in conscious rabbits. Br J Pharmacol 98:903-913, 1989
48. West J: Respiratory Physiology: The Essentials. Baltimore, Williams and Wilkins, 1974
